# Supplementary material
Source: publisher site journal article supplement (https://www.dovepress.com/article/553934)
Supplement: Supplementary file 1 [file Supplementary%20Materials.docx]

**Supplementary Table 1. The sequence of primers.**

| Gene Name | Forward | Reverse |
| --- | --- | --- |
| CBLL1 | TCAGCCCGTGGTATCTCAC | GGTGGTGCGTAATGTTGCT |
| ELAVL1 | GGATGACATTGGGAGAACGAAT | TGTCCTGCTACTTTATCCCGAAT |
| RBM15B | TCCACCAGTTCAAGCGGTTC | CGGAAGTTCACGTAGGCCA |
| YTHDF1 | ACAGTTACCCCTCGATGAGTG | GGTAGTGAGATACGGGATGGGA |
| METTL3 | CTGGGCACTTGGATTTAAGGAA | TGAGAGGTGGTGTAGCAACTT |
| GAPDH | AGGTCGGTGTGAACGGATTTG | GGGGTCGTTGATGGCAACA |
